# Supplementary material for: Attitudes and Knowledge of, and Preferences for Learning about Cultural Competence: A Study of Pharmacy Students from One Australian Pharmacy Program
Source: MDPI journal article supplement (doi:10.3390/pharmacy10030066), 2022-06-20
Supplement: s1 [file s1]

**Supplementary Table S1: Responses on testing students' knowledge on asylum seeker health entitlements and disease prevalence in asylum seekers: Responses on students' views and perspectives on asylum seekers and their rights**

| <b>Factual questions on asylum seekers</b>                                       | <b>Cultural competence domain(s) embedded within the question</b> | <b>Responses<br/>*denotes the correct response</b>                                                                                                                                                        | <b>Frequency</b>              | <b>Percentage</b>             |
|----------------------------------------------------------------------------------|-------------------------------------------------------------------|-----------------------------------------------------------------------------------------------------------------------------------------------------------------------------------------------------------|-------------------------------|-------------------------------|
| <b>Question (Q) 1.</b> Most asylum seekers in Australia come from which country? | <i>Knowledge and Desire</i>                                       | <p><i>*(a) Syria:</i></p> <p><i>(b) Sudan:</i></p> <p><i>(c) Somalia:</i></p>                                                                                                                             | <p>86</p> <p>33</p> <p>15</p> | <p>64</p> <p>25</p> <p>11</p> |
|                                                                                  |                                                                   |                                                                                                                                                                                                           |                               |                               |
| <b>Q2.</b> What healthcare services are asylum seekers entitled to in Australia? | <i>Knowledge and Desire</i>                                       | <p><i>*(a) Entitlements differ depending on asylum application status:</i></p> <p><i>(b) Free primary, secondary and tertiary healthcare services and free prescriptions:</i></p> <p><i>(c) None:</i></p> | <p>98</p> <p>23</p> <p>13</p> | <p>73</p> <p>17</p> <p>10</p> |
|                                                                                  |                                                                   |                                                                                                                                                                                                           |                               |                               |
| <b>Q3.</b> Which one is true about being an asylum seeker or refugee?            | <i>Knowledge and Desire</i>                                       | <p><i>(a) Asylum seekers have the right to reside in the country while refugees do not:</i></p> <p><i>*(b) Refugees will have had their asylum application</i></p>                                        | <p>22</p> <p>95</p>           | <p>16</p> <p>71</p>           |

|                                                                                                                                             |                             |                                                                                           |                      |                      |
|---------------------------------------------------------------------------------------------------------------------------------------------|-----------------------------|-------------------------------------------------------------------------------------------|----------------------|----------------------|
|                                                                                                                                             |                             | accepted and given humanitarian protection:<br><br>(c) The two terms mean the same thing: | 17                   | 13                   |
| <b>Q4.</b> Please categorise non-communicable diseases in asylum seekers; Heart Diseases and Diabetes                                       | <i>Knowledge and Desire</i> | (a) Most common:<br><br>*(b) Common:<br><br>(c) Least common:                             | 40<br>76<br>18       | 30<br>57<br>13       |
| <b>Q5.</b> Please categorise non-communicable diseases in asylum seekers; Heart Diseases and Cancers                                        | <i>Knowledge and Desire</i> | (a) Most common:<br><br>(b) Common:<br><br>*(c) Least common:                             | 23<br>70<br>41       | 17<br>52<br>31       |
| <b>Q6.</b> Which chronic non-communicable disease in asylum seekers has a higher prevalence compared to the resident Australian population? | <i>Knowledge and Desire</i> | (a) Asthma:<br><br>*(b) Chronic pain:<br><br>(c) Diabetes:<br><br>(d) Heart disease:      | 17<br>42<br>26<br>49 | 13<br>31<br>19<br>37 |
| <b>Q7.</b> Please categorise non-communicable diseases in asylum seekers; Diabetes and Hypertension                                         | <i>Knowledge and Desire</i> | *(a) Most common:<br><br>(b) Common:                                                      | 60<br>54             | 45<br>40             |

|                                                                                                         |                                                                   |                                                 |                  |                   |
|---------------------------------------------------------------------------------------------------------|-------------------------------------------------------------------|-------------------------------------------------|------------------|-------------------|
|                                                                                                         |                                                                   | (c) Least common:                               | 20               | 15                |
|                                                                                                         |                                                                   |                                                 |                  |                   |
| <b>Questions on attitudes/perceptions towards asylum seekers and their social welfare entitlements</b>  | <b>Cultural competence domain(s) embedded within the question</b> | <b>Responses</b>                                | <b>Frequency</b> | <b>Percentage</b> |
| <i>Q8. What do you think is the primary reason why people seek asylum?</i>                              | <i>Knowledge and Awareness</i>                                    | (a) Want a better life:                         | 107              | 80                |
|                                                                                                         |                                                                   | (b) Fear of persecution:                        | 27               | 20                |
|                                                                                                         |                                                                   |                                                 |                  |                   |
| <i>Q9. Do you think asylum seekers who come by boat should be allowed to claim asylum in Australia?</i> | <i>Desire</i>                                                     | (a) Yes:                                        | 111              | 83                |
|                                                                                                         |                                                                   | (b) No:                                         | 23               | 17                |
|                                                                                                         |                                                                   |                                                 |                  |                   |
| <i>Q10. What do you think about government policies on asylum seekers?</i>                              | <i>Awareness</i>                                                  | (a) Too hard:                                   | 57               | 43                |
|                                                                                                         |                                                                   | (b) Too soft:                                   | 5                | 4                 |
|                                                                                                         |                                                                   | (c) I do not know:                              | 55               | 41                |
|                                                                                                         |                                                                   | (d) Just about right:                           | 17               | 13                |
|                                                                                                         |                                                                   |                                                 |                  |                   |
| <i>Q11. What do you think should happen when asylum seekers enter a country?</i>                        | <i>Awareness</i>                                                  | (a) Placed in asylum seekers' accommodation:    | 90               | 67                |
|                                                                                                         |                                                                   | (b) Placed in the community with everyone else: | 27               | 20                |
|                                                                                                         |                                                                   |                                                 | 17               | 13                |

|                                                                                                                                                    |                                                                   |                                                                                                                                                              |                          |                         |
|----------------------------------------------------------------------------------------------------------------------------------------------------|-------------------------------------------------------------------|--------------------------------------------------------------------------------------------------------------------------------------------------------------|--------------------------|-------------------------|
|                                                                                                                                                    |                                                                   | (c) Placed in detention centres:                                                                                                                             |                          |                         |
|                                                                                                                                                    |                                                                   |                                                                                                                                                              |                          |                         |
| <b>Q12.</b> Which of the following do you think should be accessible to asylum seekers?                                                            | Awareness and Desire                                              | (a) Medical support only: 24<br>(b) Medical, financial and educational support: 103<br>(c) None: 2<br>(d) Education only: 4<br>(e) Financial support only: 1 | 24<br>103<br>2<br>4<br>1 | 18<br>77<br>1<br>3<br>1 |
| <b>Q13.</b> Which chronic non-communicable diseases do you think should be eligible for free healthcare entitlements including free prescriptions? | Awareness and Desire                                              | (a) All of these: 106<br>(b) Cardiovascular diseases: 9<br>(c) Diabetes: 22<br>(d) Hypertension: 2<br>(e) Respiratory diseases: 5                            | 106<br>9<br>22<br>2<br>5 | 79<br>7<br>16<br>1<br>4 |
|                                                                                                                                                    |                                                                   |                                                                                                                                                              |                          |                         |
| <b>Questions on addressing chronic non-communicable disease burden in asylum seekers</b>                                                           | <b>Cultural competence domain(s) embedded within the question</b> | <b>Responses</b>                                                                                                                                             | <b>Frequency</b>         | <b>Percentage</b>       |
| <b>Q14.</b> Do you think chronic non-communicable diseases should be screened for at entry?                                                        | Awareness and Desire                                              | (a) Yes: 99<br>(b) No: 35                                                                                                                                    | 99<br>35                 | 74<br>26                |

|                                                                                                                                                                    |                                                                   |                                                                                                                                 |                                 |                                |
|--------------------------------------------------------------------------------------------------------------------------------------------------------------------|-------------------------------------------------------------------|---------------------------------------------------------------------------------------------------------------------------------|---------------------------------|--------------------------------|
|                                                                                                                                                                    |                                                                   |                                                                                                                                 |                                 |                                |
| <i><b>Q15.</b> Whose responsibility do you think it is to provide self-care and preventative education on chronic non-communicable diseases to asylum seekers?</i> | <i>Awareness and Desire</i>                                       | <i>(a) All of them:</i><br><br><i>(b) Charities:</i><br><br><i>(c) Nurses and GPs:</i><br><br><i>(d) Public Health Workers:</i> | 108<br><br>4<br><br>13<br><br>9 | 81<br><br>3<br><br>10<br><br>7 |
|                                                                                                                                                                    |                                                                   |                                                                                                                                 |                                 |                                |
| <b>Questions on engagement with asylum seekers</b>                                                                                                                 | <b>Cultural competence domain(s) embedded within the question</b> | <b>Responses</b>                                                                                                                | <b>Frequency</b>                | <b>Percentage</b>              |
| <i><b>Q16.</b> Have you had contact previously with asylum seekers in work, social networks etc.?</i>                                                              | <i>Encounters and Desire</i>                                      | <i>(a) Yes:</i><br><br><i>(b) No:</i>                                                                                           | 54<br><br>80                    | 40<br><br>60                   |
|                                                                                                                                                                    |                                                                   |                                                                                                                                 |                                 |                                |
| <i><b>Q17.</b> In your current or future work do you think there is a chance of having contact with asylum seekers?</i>                                            | <i>Encounters and Desire</i>                                      | <i>(a) Yes:</i><br><br><i>(b) No:</i>                                                                                           | 117<br><br>17                   | 87<br><br>13                   |
